# Supplementary material
Source: PubMed Central journal article supplement (PMC4056876)
Supplement: ml200147a_si_001.pdf [file ml200147a_si_001.pdf]

## Supplementary Material

Exploiting the P-1 pocket of BRCT domains toward a structure guided inhibitor design

Ziyan Yuan,<sup>⊥</sup> Eric A. Kumar,<sup>⊥\*</sup> Stephen J. Campbell,<sup>§\*</sup> Nicholas Y. Palermo,<sup>⊥\*</sup> Smitha Kizhake,<sup>⊥</sup> J. N. Mark Glover<sup>§</sup> and Amarnath Natarajan<sup>⊥#\*</sup>

<sup>⊥</sup>Eppley Institute for Cancer Research, <sup>#</sup>Departments of Pharmaceutical Sciences, Genetics Cell Biology and Anatomy, University of Nebraska Medical Center, Omaha NE 68022

<sup>§</sup>Department of Biochemistry, University of Alberta, Edmonton, AB T6G 2H7, Canada

\*Equal contribution

### Table of Contents

|                                                                                                                 |     |
|-----------------------------------------------------------------------------------------------------------------|-----|
| Methods .....                                                                                                   | S2  |
| Determination of $K_d$ values from fluorescence polarization assay.....                                         | S2  |
| Determination of $K_i$ and $IC_{50}$ values from competitive fluorescence polarization assay.....               | S2  |
| Peptide synthesis and purification .....                                                                        | S3  |
| Table S1.Models to determine $K_i$ values from FP studies .....                                                 | S5  |
| Table S2. $K_i$ values of peptides 1-4 determined by various models.....                                        | S6  |
| Table S3. Computational study to explore the P-1 site on BRCT domains. ....                                     | S7  |
| Figure S1 Determination of $K_d$ values from fluorescence polarization assay. ....                              | S7  |
| Figure S2. Determination of $K_i$ values from competitive fluorescence polarization assay (peptide 1-4). ....   | S8  |
| Figure S3. Determination of $K_i$ values from competitive fluorescence polarization assay (peptide 5-10). ....  | S8  |
| Figure S4. Determination of $K_i$ values from competitive fluorescence polarization assay (peptide 11-15). .... | S9  |
| Figure S5. LC trace and mass spectrum of peptides. ....                                                         | S9  |
| References .....                                                                                                | S18 |

## **Methods**

### **Determination of $K_d$ values from fluorescence polarization assay**

The indicated amounts of His-BRCT was added to the wells of black 384-well, low-volume, v-bottom microplates in a final reaction volume of 20  $\mu$ L, then the fluorescein or TMR-labeled peptides were added to the wells. The plates were shaken on the plate reader for 1 min before reading. Anisotropy values, automatically calculated by the SoftMax Pro software, were measured using the fluorescence polarization function of the Spectramax M5 (Molecular Devices) plate reader. For binding affinity analysis, a percent bound value was calculated at each protein concentration using the following equation:  $(\text{anisotropy change}/\text{max anisotropy change}) \times 100$ . After plotting percent probe bound versus protein concentration, an approximate  $K_d$  (dissociation constant) was determined as the receptor concentration at which 50% of the probe was bound by using SigmaPlot 11.

### **Determination of $K_i$ and $IC_{50}$ values from competitive fluorescence polarization assay**

For the competition experiments, the indicated amounts of unlabeled peptides (1-4) were added to the 384-well plates. Then the mixture of His-BRCT protein and probes (Flu-short, Flu-long or TMR-long) were added to the wells. The plates were shaken on the plate reader for 1 min before reading. The  $IC_{50}$  were calculated using SigmaPlot and  $K_i$  values were determined by different equations (Coleska-Wang, Cheng-Prusoff,

Kenakin, Huang, Munson-Rodbard, and Roehrl equations). For the competition experiments of peptides (1-15), the  $K_i$  values were determined by Coleska-Wang equation. All of the data represent the average of at least three independent experiments  $\pm$  SEM.

### **Peptide synthesis and purification**

The peptides were synthesized using standard Fmoc-chemistry either in house or by the Tufts peptides core. The peptides were synthesized on Rink Amide NovaGel™ resin (0.25 mmol) (EMD) using N- $\alpha$ -Fmoc-protected amino acids (EMD) or unnatural N- $\alpha$ -Fmoc protected amino acids (3B Scientific Corporation or Fischer Scientific) and TBTU-HOBt coupling chemistry on a Focus XC synthesizer (Aapptec). Fmoc-acid (5eq) and TBTU/HOBt (4eq) (Chem-impex international, INC) were dissolved in 2-3 mL of NMP. DIEA (Sigma) (15 eq) was added to mixture and incubated for 5 min. This mixture was then added to Fmoc-deprotected peptide resin and allowed to couple for 1 h. Each coupling step was monitored using the Kaiser test (Sigma). To avoid derivatives with deletion, after the coupling step the N-terminal extremities were capped with a 5% acetic anhydride (Sigma), 5% DIEA, 5% HOBt, and 85% NMP. After each coupling and deprotection steps, the resin was thoroughly washed with DMF, MeOH and DCM. At the end of the synthesis, the N-terminus of the desired peptide was acetylated as described above. The peptides were then cleaved from the resin using trifluoroacetic acid (TFA) (Sigma)/TIS (Sigma)/water (95:2.5:2.5) over a 3 h period. The crude peptides were precipitated in cold ether and air-dried overnight.

Purification was performed on a preparative Agilent LC system (Agilent Technologies) using an Agilent C18 reverse-phase column Zorbax 300SB-C18 (21.2X150 mm, 5 micron). Buffer A was water with 0.05% TFA and buffer B was acetonitrile with 0.05% TFA. Gradient was buffer B from 5 to 40% in 20 min then 40 to 100% in 5 min at 20 ml/min flow rate. The peptide fractions were lyophilized on a sharp freeze -110 (Aapptec). The purity of the peptides were determined by HPLC analysis with a Agilent C18 reverse phase column (4.6X50 mm, 3.5 micron) with similar buffers but a gradient from 5 to 50 B in 20 min and a gradient from 50 to 100 B in 5 min with a 1 ml/min flow rate. Electrospray mass spectrometry was carried out on an Agilent HPLC-MS system.

Peptides were dissolved in water or DMSO to make a ~10 mM stock solution and aliquoted.

**Table S1.** Models to determine  $K_i$  values from FP studies. <sup>1-6</sup>

|                | Equation                                                                                                                              | Description                                                                                                                                                                                                                                                                                                                                                                                                               |
|----------------|---------------------------------------------------------------------------------------------------------------------------------------|---------------------------------------------------------------------------------------------------------------------------------------------------------------------------------------------------------------------------------------------------------------------------------------------------------------------------------------------------------------------------------------------------------------------------|
| Coleska-Wang   | $K_i = [I]_{50} / \left( \frac{[L]_{50}}{K_d} + \frac{[F]_0}{K_d} + 1 \right)$                                                        | $[I]_{50}$ , the concentration of the free inhibitor at 50% inhibition<br>$[L]_{50}$ , the concentration of the free labeled ligand at 50% inhibition<br>$[F]_0$ , the concentration of the free protein at 0% inhibition<br>$K_d$ , the dissociation constant of the protein-ligand complex                                                                                                                              |
| Cheng-Prusoff  | $K_i = \frac{IC_{50}}{1 + [L]/K_d}$                                                                                                   | $IC_{50}$ , the concentration of the free inhibitor at 50% inhibition<br>$[L]$ , free ligand concentration<br>$K_d$ , the dissociation constant of the protein-ligand complex                                                                                                                                                                                                                                             |
| Kenakin        | $K_i = \frac{L_b IC_{50} K_d}{L_o R_o + L_b (-R_o L_o + L_b K_d)}$                                                                    | $IC_{50}$ , the concentration of the free inhibitor at 50% inhibition<br>$K_d$ , the dissociation constant of the protein-ligand complex<br>$R_o$ , the total protein concentration<br>$L_o$ , the total ligand concentration<br>$L_b$ , the bound ligand concentration                                                                                                                                                   |
| Huang          | $K_i = \frac{IC_{50}}{\frac{1}{1 - F_o} + \frac{L_o(2 - F_o)}{2K_d}} - K_d \left( \frac{F_o}{2 - F_o} \right)$                        | $L_o$ , total concentration of the probe<br>$F_o$ , the fraction of ligand bound over the total ligand<br>$K_d$ , the dissociation constant of the protein-ligand complex<br>$IC_{50}$ , the concentration of the free inhibitor at 50% inhibition                                                                                                                                                                        |
| Munson-Rodbard | $K_i = \frac{IC_{50}}{1 + \frac{L_T(y_o + 2)}{2 \times K_d(y_o + 1)} + y_o} - K_d \left( \frac{y_o}{y_o + 2} \right)$                 | $IC_{50}$ , the concentration of the free inhibitor at 50% inhibition<br>$y_o$ , initial bound to free ratio for the labeled probe before perturbation of equilibrium by the added inhibitor<br>$L_T$ , total concentration of the labeled probe<br>$K_d$ , the dissociation constant of the protein-ligand complex                                                                                                       |
| Roehrl-Wagner  | $K_i = \frac{(IC_{50} - A)K_d X}{A}$<br>$A = R_T - (L_{ST} X) / (X + 1) - K_d X$<br>$X = \frac{A_{obs} - A_{min}}{A_{max} - A_{obs}}$ | $IC_{50}$ , the concentration of inhibitor that reduces binding of the labeled probe by 50%<br>$K_d$ , the dissociation constant of the protein-ligand complex<br>$A_{obs}$ , the observed anisotropy at a particular concentration of a compound (C)<br>$A_{min}$ , the minimum anisotropy<br>$A_{max}$ , the maximum anisotropy,<br>$L_{ST}$ , total concentration of His-BRCT<br>$R_T$ , total concentration of probes |

**Table S2.**  $K_i$  values of peptides 1-4 determined by various models.

|                | Peptide 1   |             |             | Peptide 2  |            |            | Peptide 3   |             |             | Peptide 4  |            |            |
|----------------|-------------|-------------|-------------|------------|------------|------------|-------------|-------------|-------------|------------|------------|------------|
|                | Flu-short   | Flu-long    | TMR-long    | Flu-short  | Flu-long   | TMR-long   | Flu-short   | Flu-long    | TMR-long    | Flu-short  | Flu-long   | TMR-long   |
| Coleska-Wang   | 1.07± 0.07  | -13.73±0.39 | 1.85±0.06   | -0.07±0.03 | 0.07±0.01  | 0.27±0.01  | 0.84±0.06   | 1.03±0.04   | 1.96±0.09   | -0.57±0.04 | -0.05±0.01 | 0.20±0.01  |
| Cheng-Prusoff  | 3.18±0.12   | 3.63±0.10   | 10.82±0.36  | 1.12±0.06  | 0.83±0.05  | 1.93±0.05  | 2.76±0.11   | 4.12±0.14   | 11.39±0.49  | 0.21±0.07  | 0.40±0.05  | 1.52±0.05  |
| Kenakin        | -21.68±0.83 | -13.73±0.39 | -13.59±0.45 | -7.64±0.41 | -3.15±0.21 | -2.43±0.06 | -18.81±0.75 | -15.62±0.54 | -14.31±0.62 | -1.44±0.49 | -1.50±0.19 | -1.91±0.06 |
| Huang          | 0.76±0.06   | 0.58±0.02   | -1.83±0.06  | -0.22±0.03 | -0.01±0.01 | -0.41±0.01 | 0.56±0.05   | 0.68±0.03   | -1.92±0.08  | -0.66±0.03 | -0.11±0.01 | -0.34±0.01 |
| Munson-Rodbard | 2.46±0.12   | -0.18±0.03  | 21.63±0.72  | 0.38±0.06  | -0.87±0.01 | 3.78±0.09  | 2.04±0.11   | -0.05±0.04  | 22.78±0.99  | -0.55±0.07 | -0.98±0.01 | 2.96±0.10  |
| Roehrl-Wagner  | 0.44±0.10   | -5.30±0.19  | -6.52±0.22  | 8.91±2.50  | -0.14±0.04 | -1.04±0.03 | 0.95±0.14   | -2.32±0.09  | -6.88±0.30  | 0.81±0.21  | 0.14±0.03  | -0.78±0.03 |

The peptides were screened with BRCT (2000 nM) and Flu-short (100 nM) or BRCT (1000 nM) with Flu-long and TMR-long (100 nM)

Flu-long = FITC-SRSTpSPTFNK

Flu-short = FITC-βA-pSPTF

TMR-long = TMR-SRSTpSPTFNK

**Table S3.** Computational study to explore the P-1 site on BRCT domains.

| Relative Energies of BRCT bound peptides (kcal/mol) |       |       |        |
|-----------------------------------------------------|-------|-------|--------|
| Protein                                             | BRCA1 | MDC1  | TopBP1 |
| Peptide sequence                                    |       |       |        |
| Modification                                        | pSPTF | pSQEY | pTPELY |
| none                                                | 0     | 0     | 0      |
| 14                                                  | -0.4  | -0.16 | -0.15  |
| 15                                                  | -0.91 | -0.2  | -0.53  |

**Figure S1** Determination of  $K_d$  values from fluorescence polarization assay.

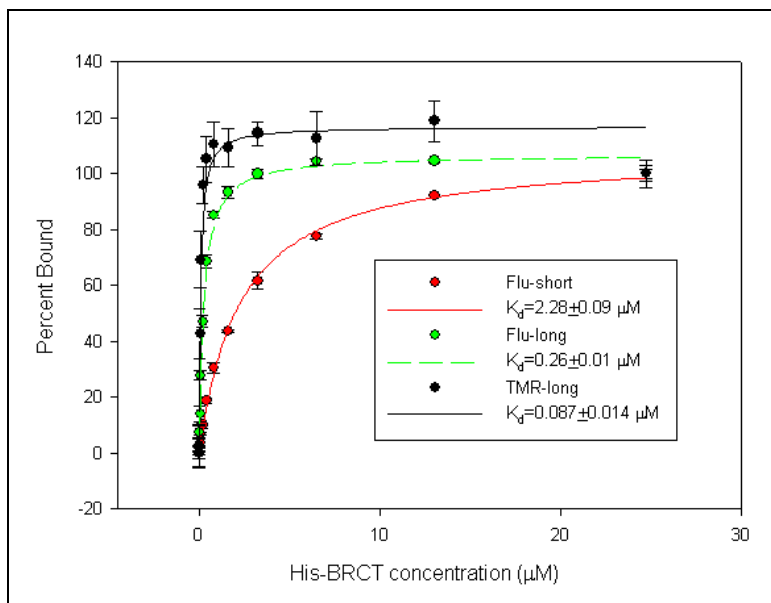

**Figure S2.** Determination of  $K_i$  values from competitive fluorescence polarization assay (peptide 1-4).

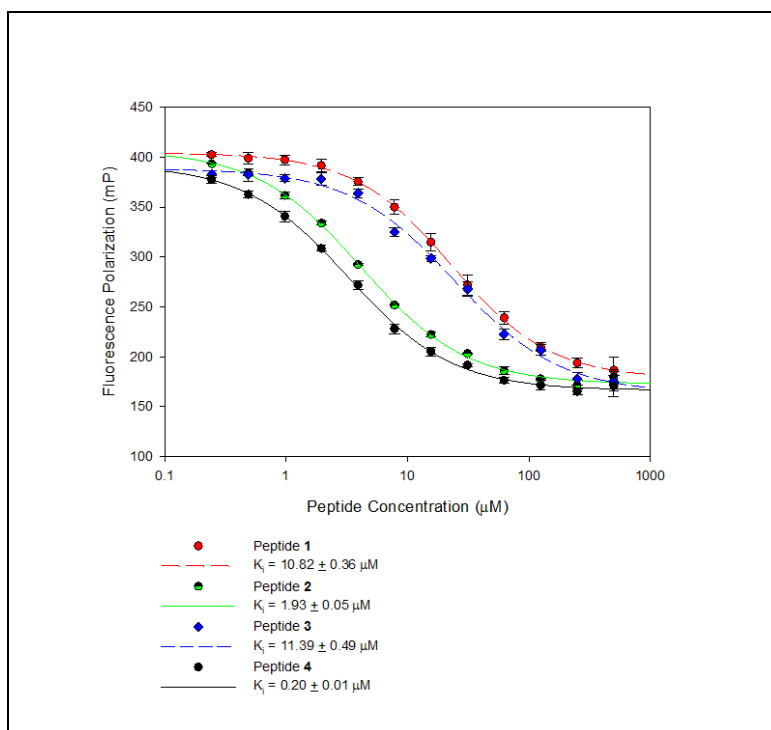

**Figure S3.** Determination of  $K_i$  values from competitive fluorescence polarization assay (peptide 5-10).



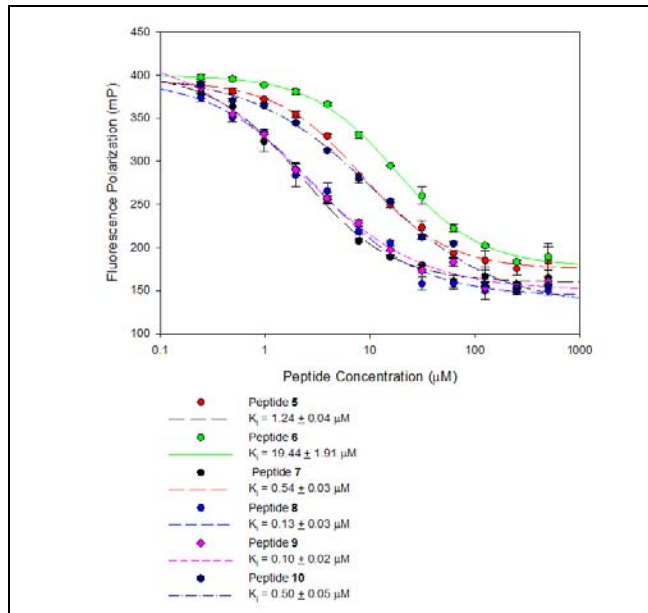

**Figure S4.** Determination of  $K_d$  values from competitive fluorescence polarization assay (peptide 11-15).

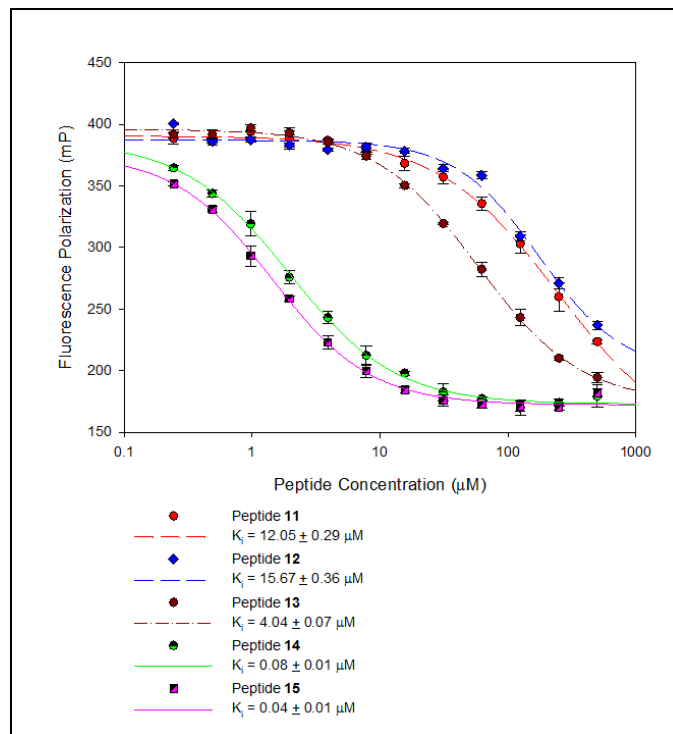

**Figure S5.** LC trace and mass spectrum of peptides.

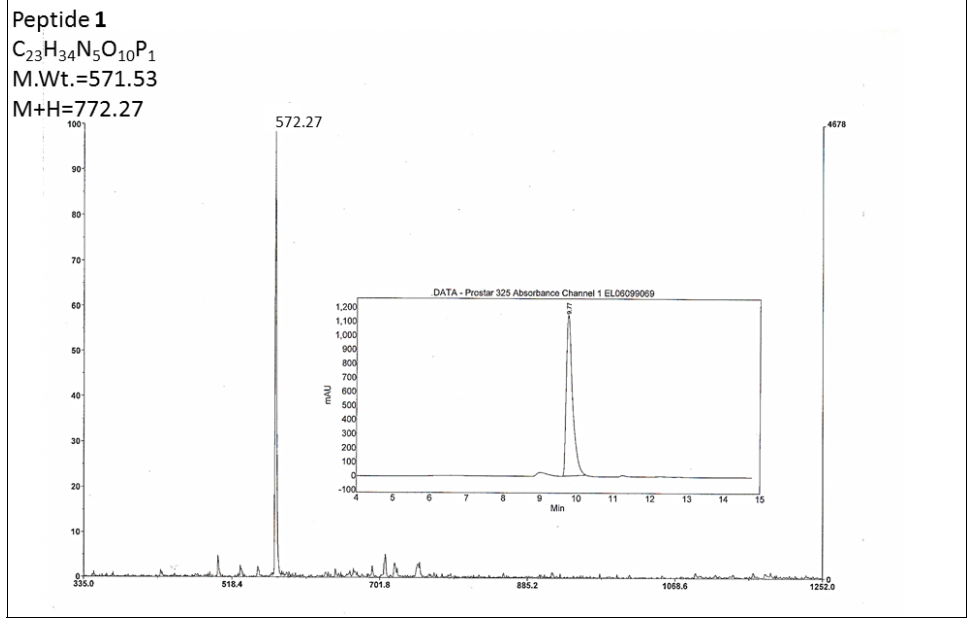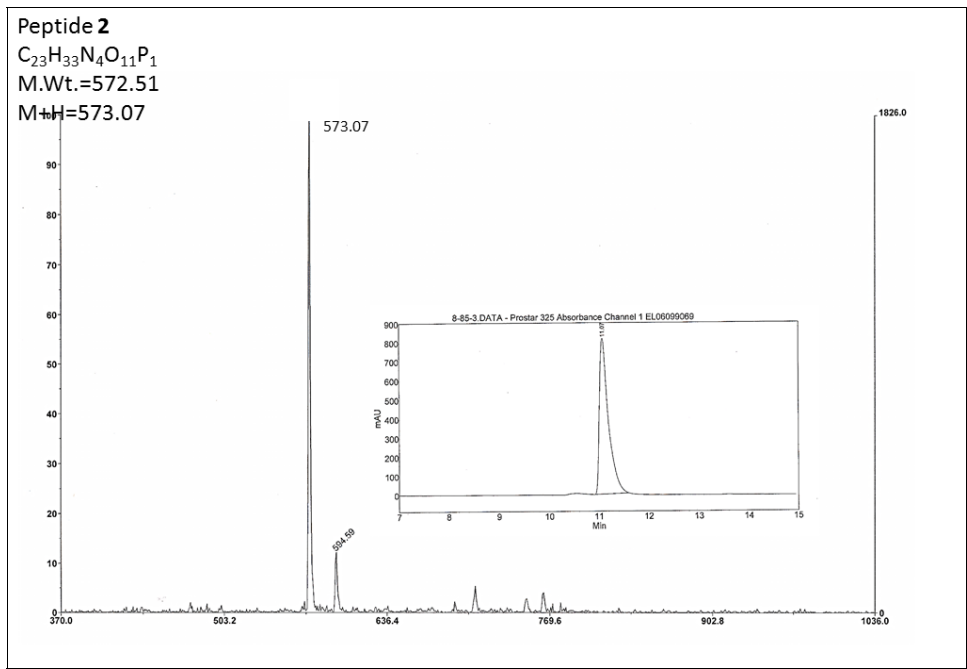

Peptide 3  
 $C_{24}H_{35}N_4O_{10}P_1$   
M.Wt.=570.54

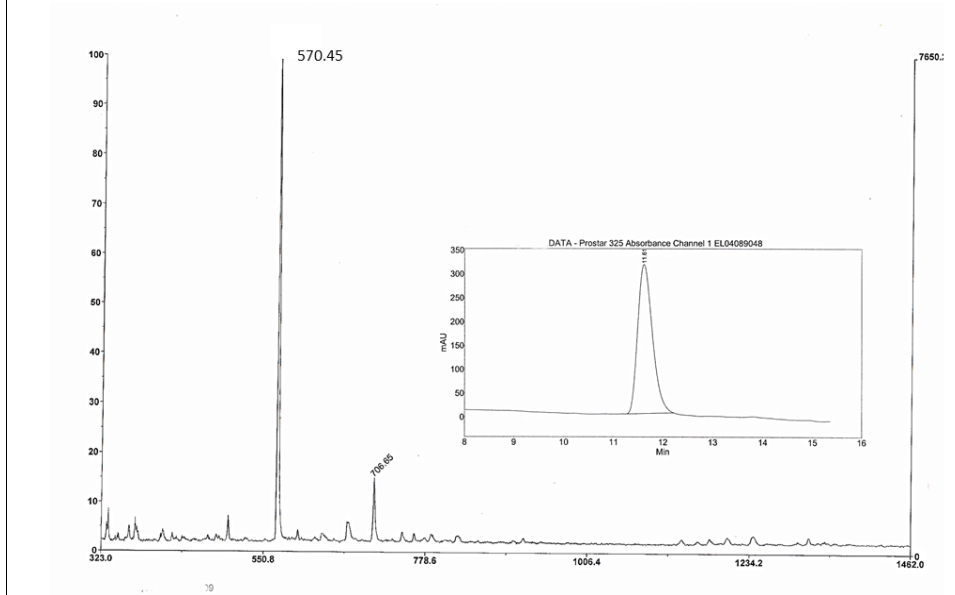

Peptide 4  
 $C_{24}H_{35}N_4O_{10}P_1$   
M.Wt.=570.53  
M+H=571.39

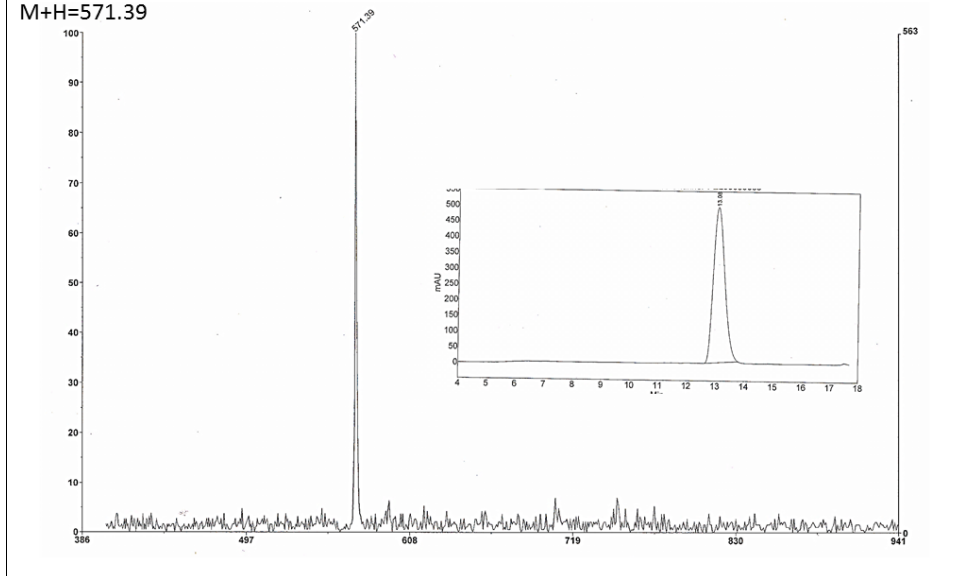

Peptide 5  
 $C_{23}H_{34}N_5O_{10}P_1$   
M.Wt.=770.53  
M+H=771.19

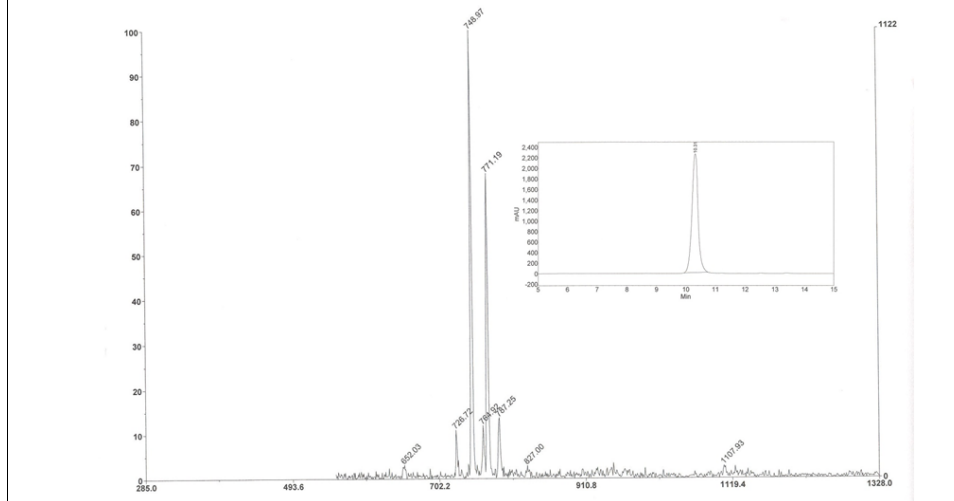

Peptide 6  
 $C_{23}H_{34}N_5O_{10}P_1$   
M.Wt.=770.53  
M+H=771.45

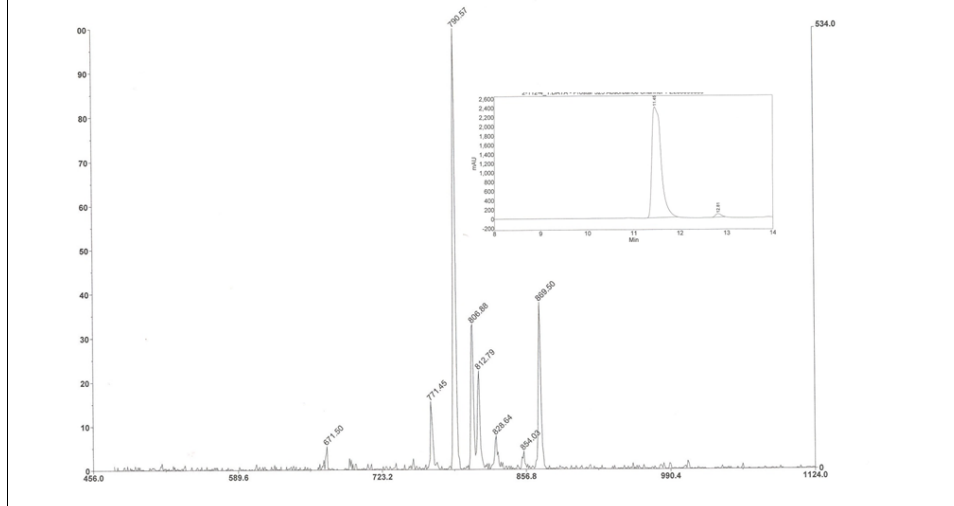

Peptide 7  
 $C_{24}H_{36}N_5O_9P_1$   
M.Wt.=766.55  
M+H=767.70

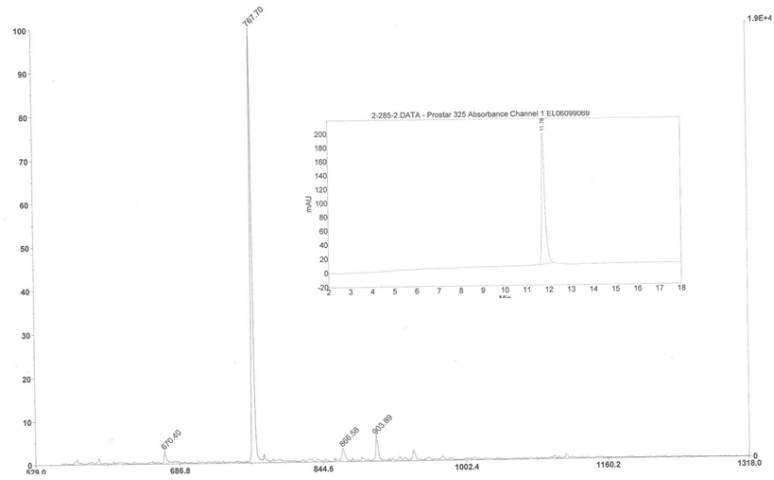

Peptide 8  
 $C_{24}H_{35}N_4O_{10}P_1$   
M.Wt.=767.54  
M=767.95

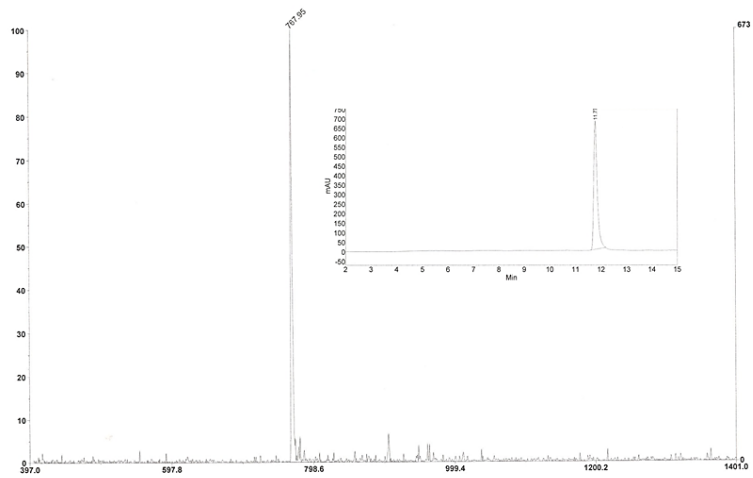

**Peptide 9**

$C_{31}H_{41}N_4O_{10}P_1$

M.Wt.=660.65

M+Na=683.22

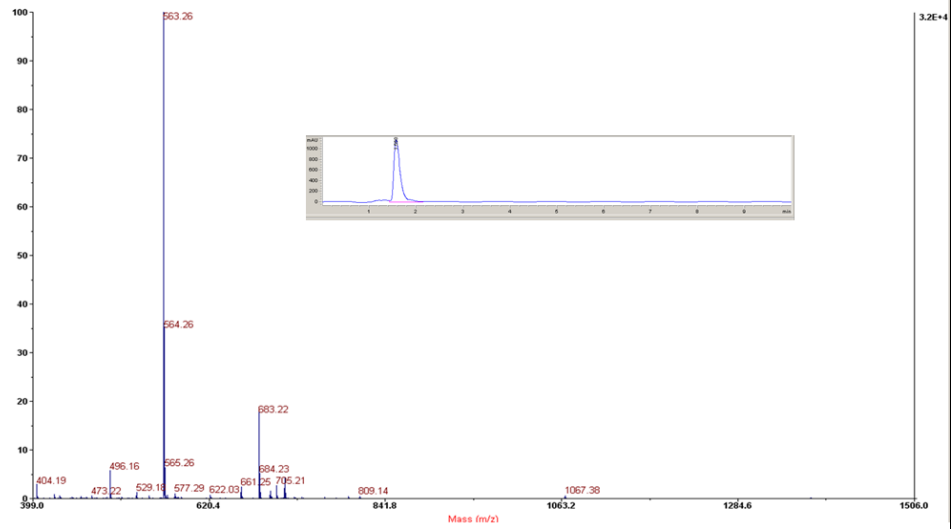

**Peptide 10**

$C_{32}H_{43}N_4O_{10}P_1$

M.Wt.=674.68

M+Na=697.23

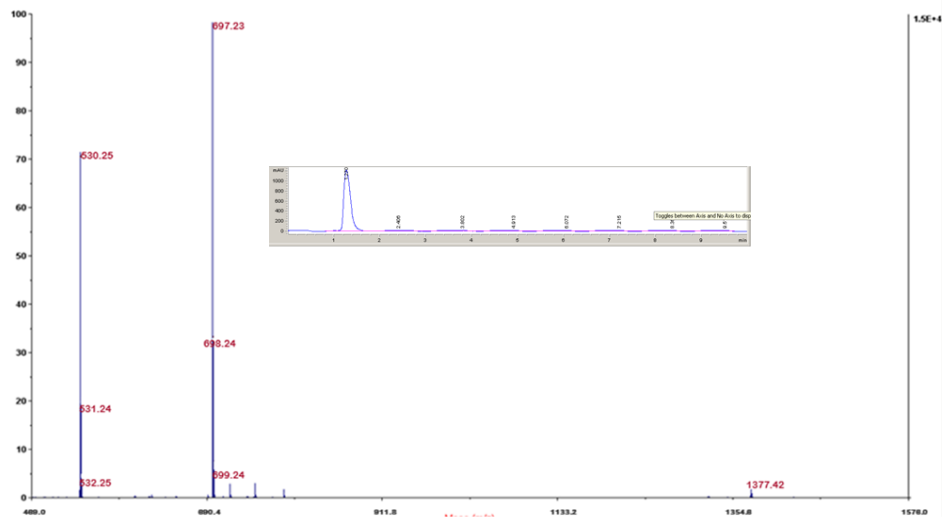

**Peptide 11**

$C_{33}H_{45}N_4O_{10}P_1$

M.Wt.=688.70

M+Na=711.68

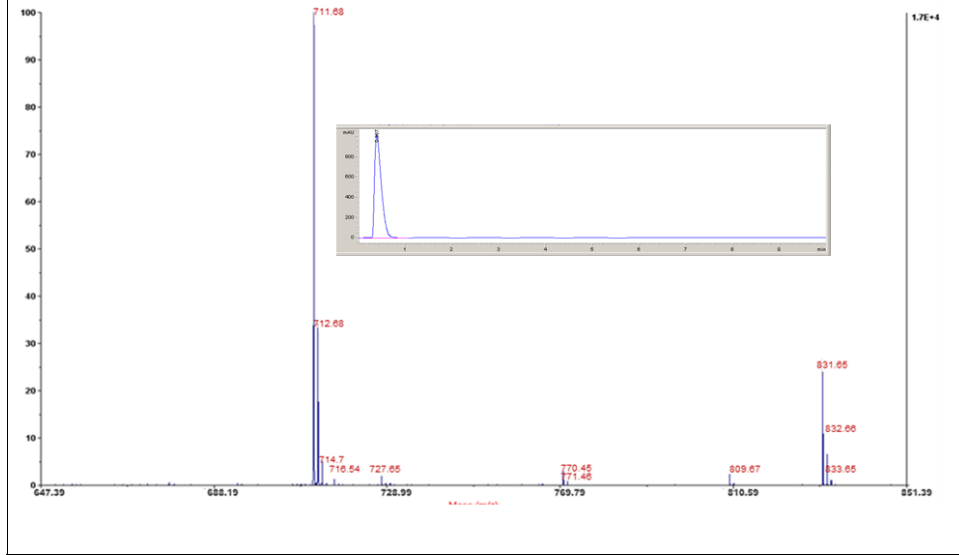

**Peptide 12**

$C_{34}H_{41}N_4O_{10}P_1$

M.Wt.=696.68

M+Na-2H=717.34

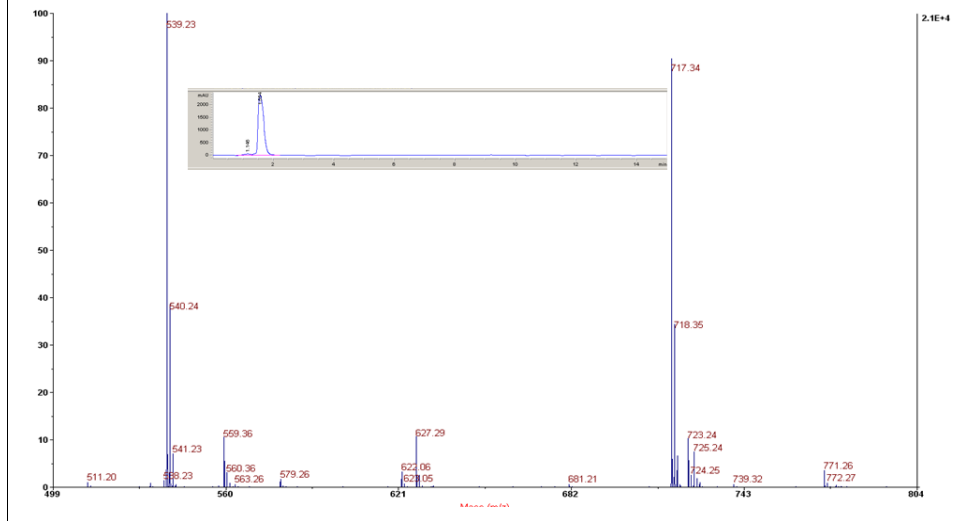

Peptide 13  
 $C_{33}H_{45}N_4O_{12}P_1$   
M.Wt.=720.70  
M+Na=743.69

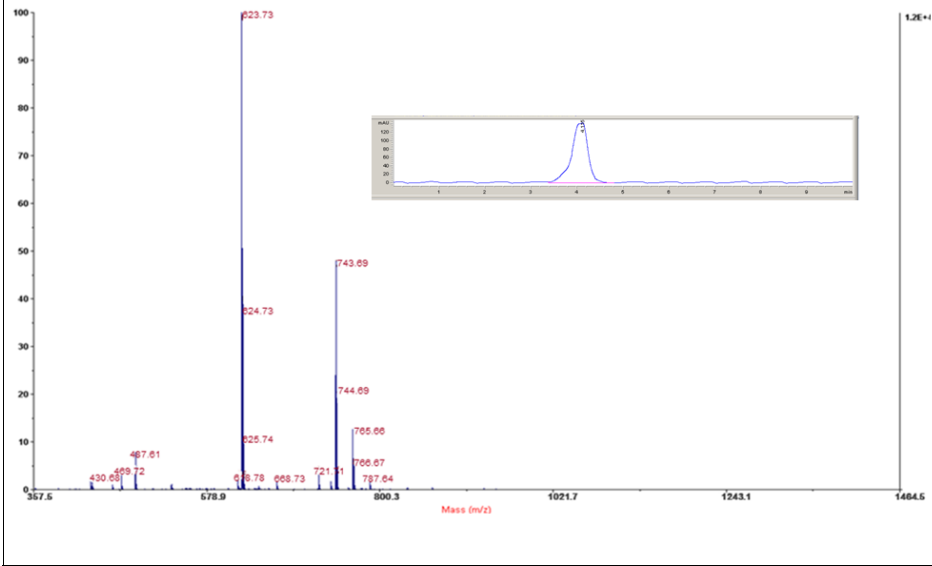

Peptide 14  
 $C_{35}H_{41}N_4O_{10}P_1$   
M.Wt.=708.69  
M+H=709.27

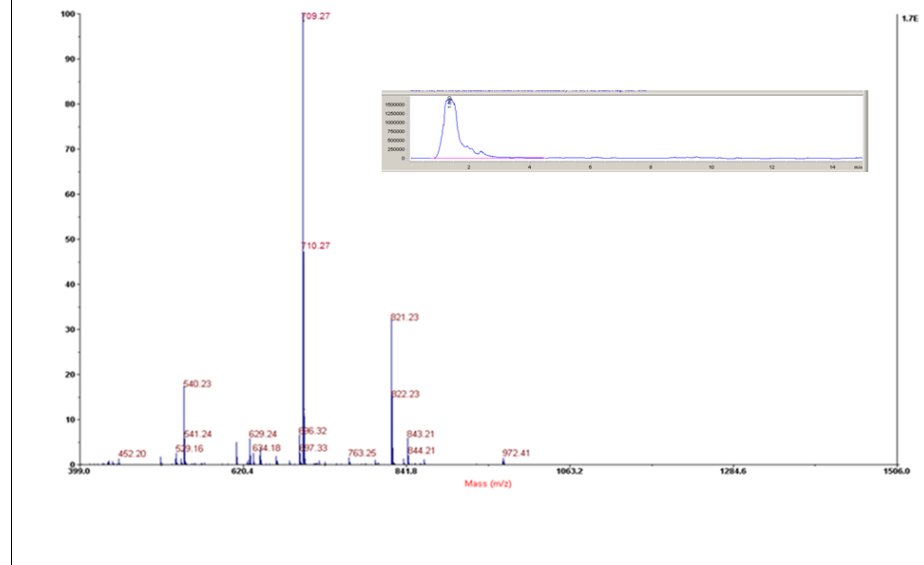



Peptide 15

$C_{32}H_{41}N_4O_{10}P_1$

M.Wt.=672.66

M+Na=695.19

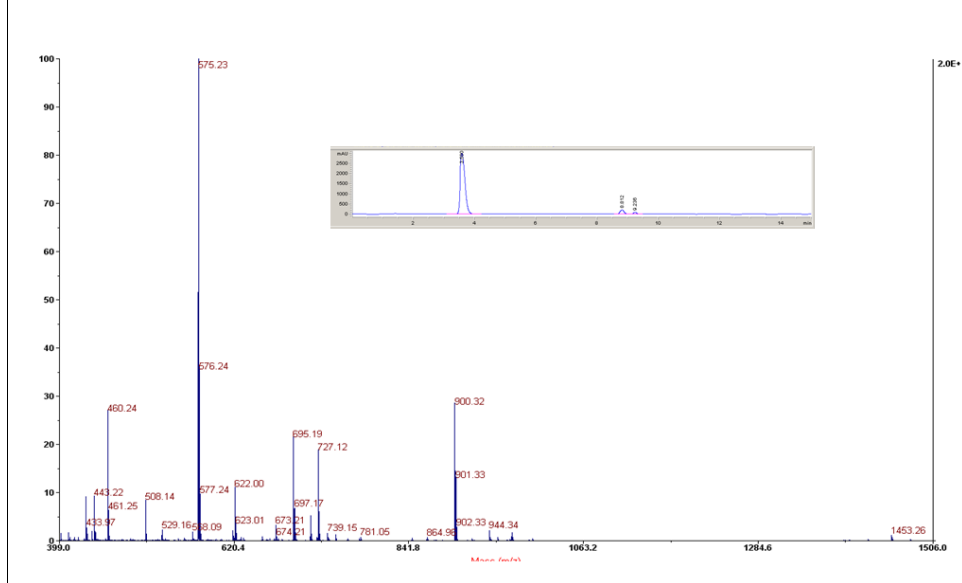

## References

1. Nikolovska-Coleska, Z.; Wang, R.; Fang, X.; Pan, H.; Tomita, Y.; Li, P.; Roller, P. P.; Krajewski, K.; Saito, N. G.; Stuckey, J. A.; Wang, S. Development and optimization of a binding assay for the XIAP BIR3 domain using fluorescence polarization. *Anal. Biochem.* **2004**, *332*, 261-273.
2. Cheng, Y.; Prusoff, W. H. Relationship between the inhibition constant ( $K_1$ ) and the concentration of inhibitor which causes 50 per cent inhibition ( $I_{50}$ ) of an enzymatic reaction. *Biochem. Pharmacol.* **1973**, *22*, 3099-3108.
3. T. Kenakin *Pharmacological Analysis of Drug-Receptor Interaction*; Lippincott-Raven: Philadelphia, 1997; .
4. Huang, X. Fluorescence polarization competition assay: the range of resolvable inhibitor potency is limited by the affinity of the fluorescent ligand. *J. Biomol. Screen.* **2003**, *8*, 34-38.
5. Munson, P. J.; Rodbard, D. An exact correction to the "Cheng-Prusoff" correction. *J. Recept. Res.* **1988**, *8*, 533-546.
6. Roehrl, M. H.; Wang, J. Y.; Wagner, G. A general framework for development and data analysis of competitive high-throughput screens for small-molecule inhibitors of protein-protein interactions by fluorescence polarization. *Biochemistry* **2004**, *43*, 16056-16066.
